# Supplementary material for: Comparison of the Antioxidant and Sensorial Properties of Kvass Produced from Mountain Rye Bread with the Addition of Selected Plant Raw Materials
Source: MDPI journal article supplement (doi:10.3390/foods13030357), 2024-01-23
Supplement: s1 [file s1]

**Table S1.** Total antioxidant capacity in kvass samples (Kvass x Incubation Temperature).

| Factor                                    |      | Total Antioxidant Activity             |                                        |
|-------------------------------------------|------|----------------------------------------|----------------------------------------|
| Kvass (K) x Fermentation Temperature (IT) |      | ABTS ( $\mu\text{mol Trolox g}^{-1}$ ) | DPPH ( $\mu\text{mol Trolox g}^{-1}$ ) |
| Control kvass                             |      | 0.216 $\pm$ 0.004 fgh                  | 1.31 $\pm$ 0.04 b                      |
| BC (J) 3%                                 |      | 0.271 $\pm$ 0.006 j                    | 1.54 $\pm$ 0.04 ef                     |
| BC (J) 5%                                 |      | 0.365 $\pm$ 0.004 n                    | 2.70 $\pm$ 0.06 m                      |
| BC (J) 10%                                |      | 0.703 $\pm$ 0.005 r                    | 3.55 $\pm$ 0.04 o                      |
| BC (I) 3%                                 |      | 0.157 $\pm$ 0.004 a                    | 1.06 $\pm$ 0.03 a                      |
| BC (I) 5%                                 |      | 0.171 $\pm$ 0.007 bc                   | 1.29 $\pm$ 0.04 b                      |
| BC (I) 10%                                |      | 0.218 $\pm$ 0.005 gh                   | 1.55 $\pm$ 0.03 ef                     |
| SB (J) 3%                                 |      | 0.201 $\pm$ 0.004 ef                   | 1.42 $\pm$ 0.04 cd                     |
| SB (J) 5%                                 | 28°C | 0.252 $\pm$ 0.002 i                    | 1.75 $\pm$ 0.04 h                      |
| SB (J) 10%                                |      | 0.355 $\pm$ 0.007 mn                   | 2.44 $\pm$ 0.04 k                      |
| SB (I) 3%                                 |      | 0.152 $\pm$ 0.004 a                    | 1.08 $\pm$ 0.03 a                      |
| SB (I) 5%                                 |      | 0.170 $\pm$ 0.002 bc                   | 1.26 $\pm$ 0.02 b                      |
| SB (I) 10%                                |      | 0.213 $\pm$ 0.005 fg                   | 1.47 $\pm$ 0.02 de                     |
| P (I) 3%                                  |      | 0.294 $\pm$ 0.009 k                    | 1.76 $\pm$ 0.03 h                      |
| P (I) 5%                                  |      | 0.384 $\pm$ 0.008 o                    | 2.63 $\pm$ 0.05 lm                     |
| P (I) 10%                                 |      | 0.763 $\pm$ 0.010 s                    | 4.64 $\pm$ 0.04 p                      |
| Control kvass                             |      | 0.313 $\pm$ 0.003 l                    | 2.35 $\pm$ 0.01 jk                     |
| BC (J) 3%                                 |      | 0.321 $\pm$ 0.003 l                    | 2.17 $\pm$ 0.02 i                      |
| BC (J) 5%                                 |      | 0.452 $\pm$ 0.002 q                    | 2.91 $\pm$ 0.08 n                      |
| BC (J) 10%                                |      | 0.795 $\pm$ 0.005 t                    | 4.60 $\pm$ 0.02 p                      |
| BC (I) 3%                                 |      | 0.166 $\pm$ 0.004 abc                  | 1.32 $\pm$ 0.02 bc                     |
| BC (I) 5%                                 |      | 0.191 $\pm$ 0.004 de                   | 1.62 $\pm$ 0.02 f                      |
| BC (I) 10%                                |      | 0.225 $\pm$ 0.005 gh                   | 1.75 $\pm$ 0.03 gh                     |
| SB (J) 3%                                 | 34°C | 0.230 $\pm$ 0.002 h                    | 1.32 $\pm$ 0.02 bc                     |
| SB (J) 5%                                 |      | 0.281 $\pm$ 0.003 jk                   | 1.62 $\pm$ 0.02 f                      |
| SB (J) 10%                                |      | 0.390 $\pm$ 0.006 o                    | 1.75 $\pm$ 0.03 gh                     |
| SB (I) 3%                                 |      | 0.157 $\pm$ 0.004 ab                   | 1.64 $\pm$ 0.04 fg                     |
| SB (I) 5%                                 |      | 0.179 $\pm$ 0.003 cd                   | 1.82 $\pm$ 0.01 h                      |
| SB (I) 10%                                |      | 0.253 $\pm$ 0.005 i                    | 2.56 $\pm$ 0.05 l                      |
| P (I) 3%                                  |      | 0.342 $\pm$ 0.003 m                    | 2.25 $\pm$ 0.03 ij                     |
| P (I) 5%                                  |      | 0.428 $\pm$ 0.002 p                    | 2.58 $\pm$ 0.04 l                      |
| P (I) 10%                                 |      | 0.792 $\pm$ 0.003 t                    | 4.84 $\pm$ 0.06 q                      |
| Mean                                      |      | 0.321 $\pm$ 0.185                      | 2.10 $\pm$ 1.00                        |
| Significance (F / p value)                |      |                                        |                                        |
| K                                         |      | F= 9982.4<br>p<0.0001                  | F= 5222.6<br>p<0.0001                  |
| IT                                        |      | F= 1695.5<br>p<0.0001                  | F= 2594.1<br>p<0.0001                  |
| K x IT                                    |      | F= 58.3<br>p<0.0001                    | F= 295.7<br>p<0.0001                   |

The data shown are mean  $\pm$  standard deviation (SD). Different letters within a column indicate significant

The different letters in column indicate significant differences between the means at a significance level of  $p = 0.05$ , differences according to Tukey's test at  $p < 0.05$ ), BC - black chokeberry; SB - sea buckthorn; P - peppermint; J - juice, I - infusion.
